# Supplementary material
Source: publisher figshare collection journal article supplement (https://frontiersin.figshare.com/ndownloader/files/35572127)
Supplement: Supplementary file [file 35572127]

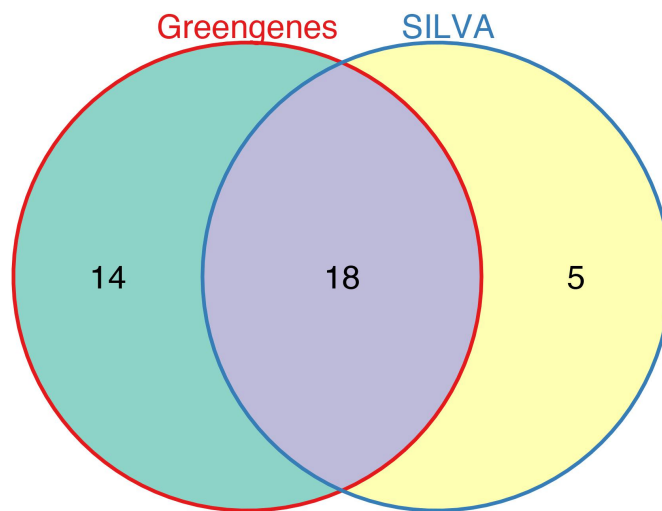

**Supplementary Figure 4.** Different gut microbiota genera found in microbiome analysis of 16S rRNA data using Greengenes and SILVA as reference, respectively.
